# Supplementary material for: Histopathologic, immunophenotypic, and proteomics characteristics of low-grade phyllodes tumor and fibroadenoma: more similarities than differences
Source: PubMed Central journal article supplement (PMC7319981; doi:10.1038/s41523-020-0169-8), 2020-06-26
Supplement: 41523_2020_169_MOESM1_ESM.pdf [file 41523_2020_169_MOESM1_ESM.pdf]

**Supplementary Table 1.** Clinicopathologic features and follow-up of low-grade phyllodes tumors

| <b>Age (y)</b> | <b>Size (cm)</b> | <b>AFIP 2-tier diagnosis</b> | <b>WHO 3-tier diagnosis</b> | <b>Follow-up</b>                            |
|----------------|------------------|------------------------------|-----------------------------|---------------------------------------------|
| 57             | 4                | Low-grade                    | Benign                      | Re-excision negative                        |
| 43             | 1.8              | Low-grade                    | Borderline                  | Re-excision negative                        |
| 50             | 6                | Low-grade                    | Borderline                  | Re-excision negative                        |
| 49             | 3.5              | Low-grade                    | Benign                      | Re-excision negative                        |
| 35             | 3.5              | Low-grade                    | Benign                      | Re-excision negative                        |
| 35             | 7                | Low-grade                    | Benign                      | Re-excision positive; recurred in 3.5 years |
| 18             | 3.9              | Low-grade                    | Benign                      | Re-excision negative                        |
| 30             | 4.9              | Low-grade                    | Borderline                  | Re-excision negative                        |
| 42             | 2.8              | Low-grade                    | Borderline                  | Re-excision negative                        |
| 45             | 2                | Low-grade                    | Benign                      | Re-excision negative                        |
| 16             | 2.7              | Low-grade                    | Benign                      | Re-excision positive                        |
| 22             | 4.3              | Low-grade                    | Borderline                  | Re-excision negative                        |
| 53             | 4.5              | Low-grade                    | Borderline                  | Re-excision negative                        |
| 21             | 2.3              | Low-grade                    | Benign                      | Re-excision negative                        |
| 27             | 0.8              | Low-grade                    | Benign                      | Re-excision negative                        |
| 44             | 1.3              | Low-grade                    | Benign                      | Re-excision negative                        |
| 49             | 1.2              | Low-grade                    | Benign                      | Re-excision negative                        |
| 22             | 2.3              | Low-grade                    | Benign                      | No recurrence                               |
| 50             | 2.3              | Low-grade                    | Benign                      | No recurrence                               |
| 45             | 1.5              | Low-grade                    | Benign                      | No recurrence                               |
| 21             | 2.5              | Low-grade                    | Benign                      | Re-excision negative                        |
| 14             | 5.1              | Low-grade                    | Benign                      | No recurrence                               |
| 42             | 2.1              | Low-grade                    | Benign                      | Re-excision negative                        |
| 41             | 4.2              | Low-grade                    | Borderline                  | Re-excision negative                        |
| 48             | 1.5              | Low-grade                    | Benign                      | Re-excision negative                        |
| 63             | 1.2              | Low-grade                    | Borderline                  | No recurrence                               |
| 27             | 1                | Low-grade                    | Benign                      | No recurrence                               |
| 39             | 3.1              | Low-grade                    | Benign                      | Re-excision positive                        |
| 14             | 3                | Low-grade                    | Benign                      | Re-excision positive; recurred in 2 years   |
| 24             | 3.6              | Low-grade                    | Benign                      | Re-excision negative                        |
| 14             | 3.6              | Low-grade                    | Borderline                  | No recurrence                               |
